# Supplementary material for: Air activation of charcoal monoliths for capacitive energy storage
Source: Royal Society of Chemistry journal article supplement (doi:10.1039/d1ra02192c), 2021-01-01
Supplement: d1ra02192c1.pdf [file d1ra02192c1.pdf]

1 **Supporting information**

2 **Air activation of charcoal monoliths for capacitive energy storage**

3 Yu Ma<sup>a,b</sup>, Hanqin Liang<sup>a</sup>, Jinwei Yin<sup>a</sup>, Dongxu Yao<sup>a</sup>, Yongfeng Xia<sup>a</sup>, Kaihui Zuo<sup>a</sup>,

4 Yu-Ping Zeng<sup>a,\*</sup>

5

6 <sup>a</sup>State Key Laboratory of High Performance Ceramics and Superfine Microstructure,

7 Shanghai Institute of Ceramics, Chinese Academy of Sciences, Shanghai 200050,

8 China

9 <sup>b</sup>Center of Materials Science and Optoelectronics Engineering, University of Chinese

10 Academy of Sciences, Beijing 100049, China

11

12 \*Corresponding author: Yu-Ping Zeng

13 E-mail: [yuping-zeng@mail.sic.ac.cn](mailto:yuping-zeng@mail.sic.ac.cn)

14

15

16

17

18

19

20

21

22

23

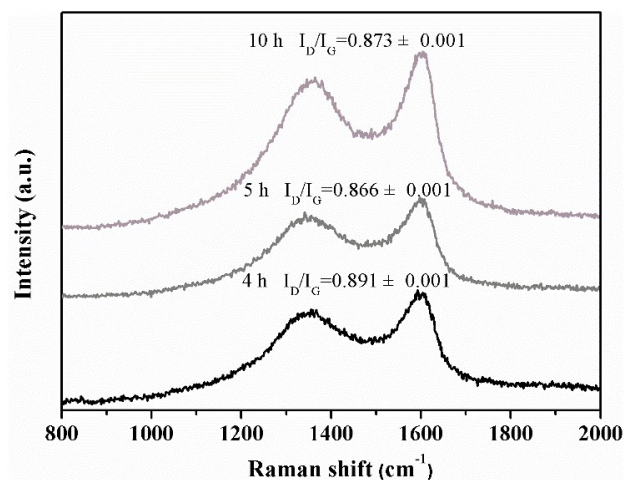

24

25 Figure S1. Raman spectra of the charcoal monoliths activated for 4 h to 10 h.

26

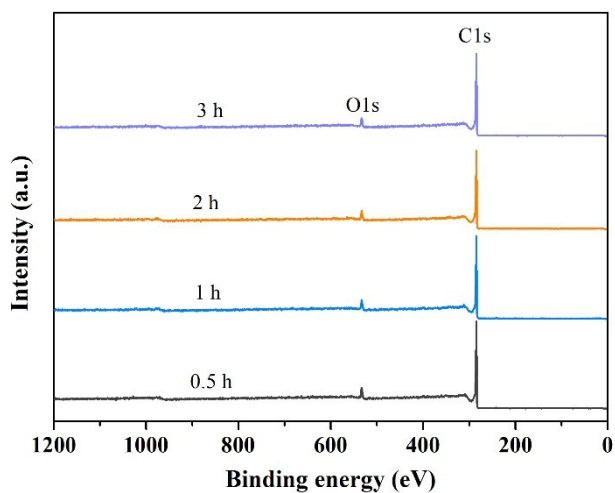

27

28 Figure S2. Survey XPS spectra of the charcoal monoliths activated for 0.5 h to 3 h.

29

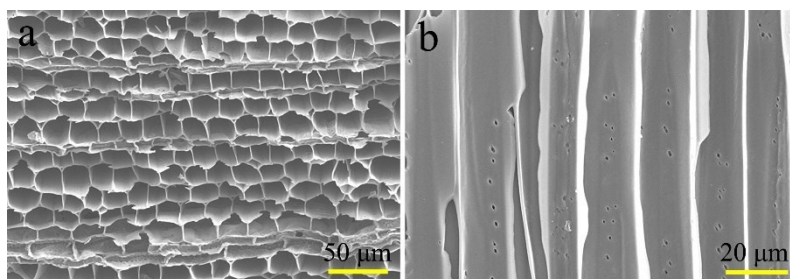

30

31 Figure S3. SEM micrographs of charcoal monolith activated at 300 °C for 1 h: (a) transverse

32

section, (b) vertical section.

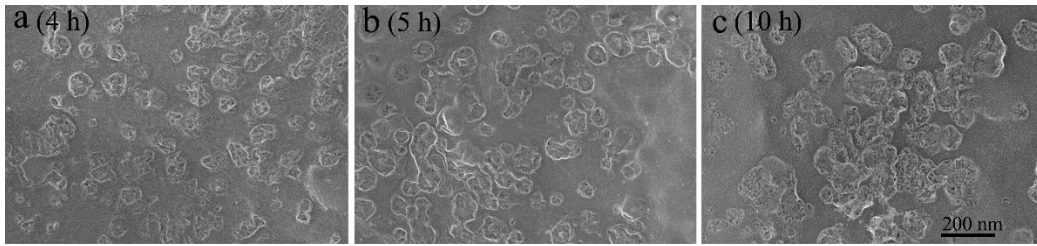

33

34

Figure S4. SEM micrographs of cell surface for the carbon monoliths activated

35

for (a) 4 h, (b) 5 h and (c) 10 h.

36
